# Supplementary material
Source: PubMed Central journal article supplement (PMC3437054)
Supplement: NIHMS345059-supplement-01.pdf [file NIHMS345059-supplement-01.pdf]

## FIGURE LEGENDS

**Fig. S1.** Kinetics of PCNA opening. Opening of PCNA-WC<sup>AEDANS</sup> was measured as described in Fig. 2A, except at higher RFC concentration (final concentrations: 2  $\mu$ M RFC, 0.25  $\mu$ M PCNA and 0.5 mM ATP). A 2-exponential fit of the data yields  $k_{\text{open}(1)} = 2.5 \text{ s}^{-1}$  and  $k_{\text{open}(2)} = 0.6 \text{ s}^{-1}$ .

**Fig. S2.** DNA binding to RFC measured under various conditions. (A) ptDNA<sub>TAMRA</sub> (5 nM) and ssDNA<sub>TAMRA</sub> (5 nM, 5'-labeled 55-nt ssDNA) were titrated with RFC (0 – 50 nM) in the presence of ATP $\gamma$ S (0.1 mM) and PCNA (200 nM) in buffer A. The fluorescence signal (normalized to free DNA) was plotted *versus* RFC concentration, and the data fit to a quadratic function yielded  $K_D \leq 1 \text{ nM}$  for both DNA substrates. (B) Kinetics of ptDNA<sub>TAMRA</sub> binding/release measured as in Fig. 3A, at  $\Delta t$ : 0.02 and 3s, except with higher protein concentrations (final concentrations: 0.1 or 1  $\mu$ M RFC, 3  $\mu$ M PCNA, 0.04  $\mu$ M ptDNA<sub>TAMRA</sub> and 0.5 mM ATP). The exponential binding rate is  $17 \text{ s}^{-1}$  at 1  $\mu$ M RFC,  $\Delta t$ : 3s. (C) Kinetics of ptDNA<sub>TAMRA</sub> binding measured as in Fig. 3A, at  $\Delta t$ : 10s, except with ATP $\gamma$ S instead of ATP in the reaction (final concentrations: 0.1 RFC, 0.4  $\mu$ M PCNA, 0.04  $\mu$ M ptDNA<sub>TAMRA</sub> and 0.1 mM ATP $\gamma$ S). The relative change in ptDNA<sub>TAMRA</sub> fluorescence intensity on binding RFC•ATP $\gamma$ S•PCNA is 1:2.1 (from A, C).

**Fig. S3.** Data from Fig. 5 shown on a log scale for time. (A) Overlay of data from PCNA opening/closing, DNA binding/release, ATP hydrolysis and Pi release experiments provides a visual of rapid ptDNA binding to RFC•ATP•PCNA complex (formed during pre-incubation,  $\Delta t$ :

3 s) triggering ATP hydrolysis, PCNA closure, Pi release, PCNA•ptDNA dissociation and catalytic turnover. Data for (B) PCNA opening ( $\Delta t$ : 0.1, 7 s), (C) PCNA opening/closing, (D) ptDNA binding/release, (E) ATP hydrolysis ( $\Delta t$ : 2 s), and (F) Pi release (only  $\Delta t$ : 0.02, 0.2, 2 s shown in C, D, F for clarity), were all fit simultaneously to the model shown in Scheme I. The black lines are simulations generated by the model based on parameters listed in Table I.

**Fig. S4.** Confidence contour analysis. Confidence contours for the global fit to rate constants derived by simultaneously fitting all the data to the model in Scheme I. All 6 pair wise combinations of the 4 unknown rate constants:  $k_2$  (linked with  $k_{-2}$ ,  $k_3$ ,  $k_{-3}$ ,  $k_4$ ),  $k_8$ ,  $k_{11}$ ,  $k_{12}$  (linked with  $k_{-12}$ ) are shown. The central red zone shows the area of good fit. The yellow band between the red and green zones delineates a 10% increase in  $\chi^2$  value, which was used to estimate the upper and lower confidence limits on each kinetic parameter listed in Table I.

**Fig. S5.** DNA dependence of RFC-catalyzed ATP hydrolysis and Pi release. RFC-catalyzed Pi release is measured by change in fluorescence intensity of MDCC-PBP. Pre-incubation of RFC, PCNA with ATP ( $\Delta t$ : 2 s) followed by addition of ptDNA results in a burst of Pi release followed by a linear steady state phase. In contrast, no burst phase is detectable with ssDNA, only a linear rate of  $1.1 \mu\text{M s}^{-1}$ .

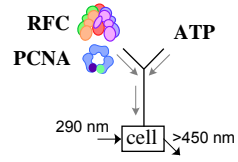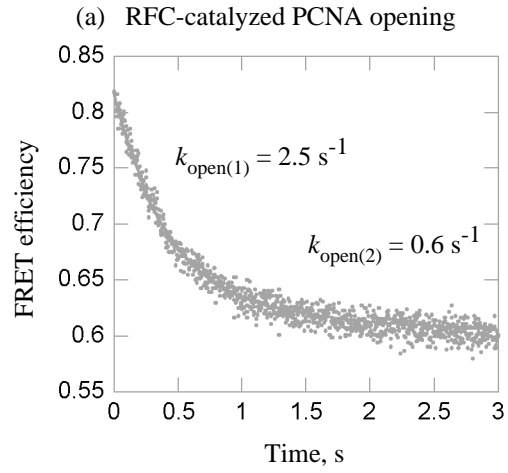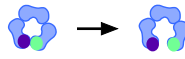

Figure S1

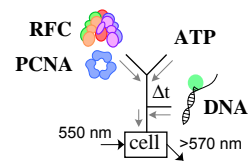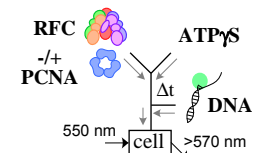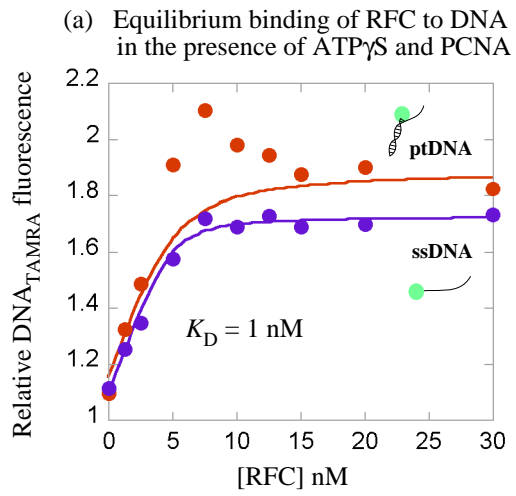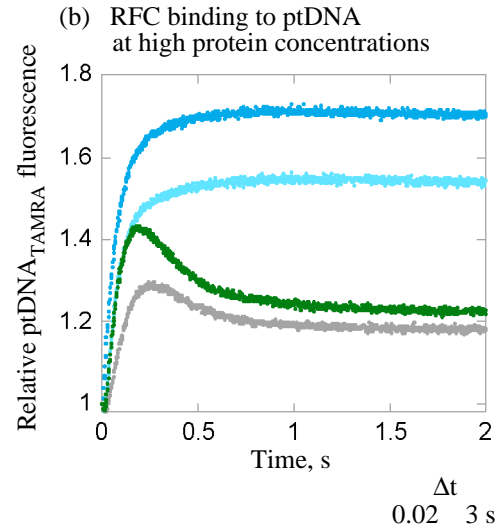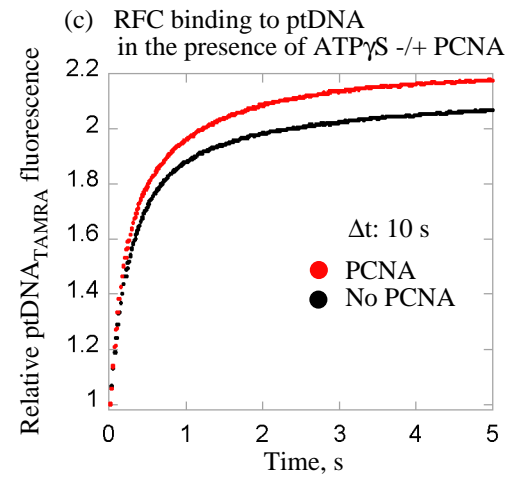

$\Delta t$   
 0.02 3 s  
 [RFC] 0.1  $\mu$ M, [PCNA] 3  $\mu$ M ● ●  
 [RFC] 1  $\mu$ M, [PCNA] 3  $\mu$ M ● ●

Figure S2

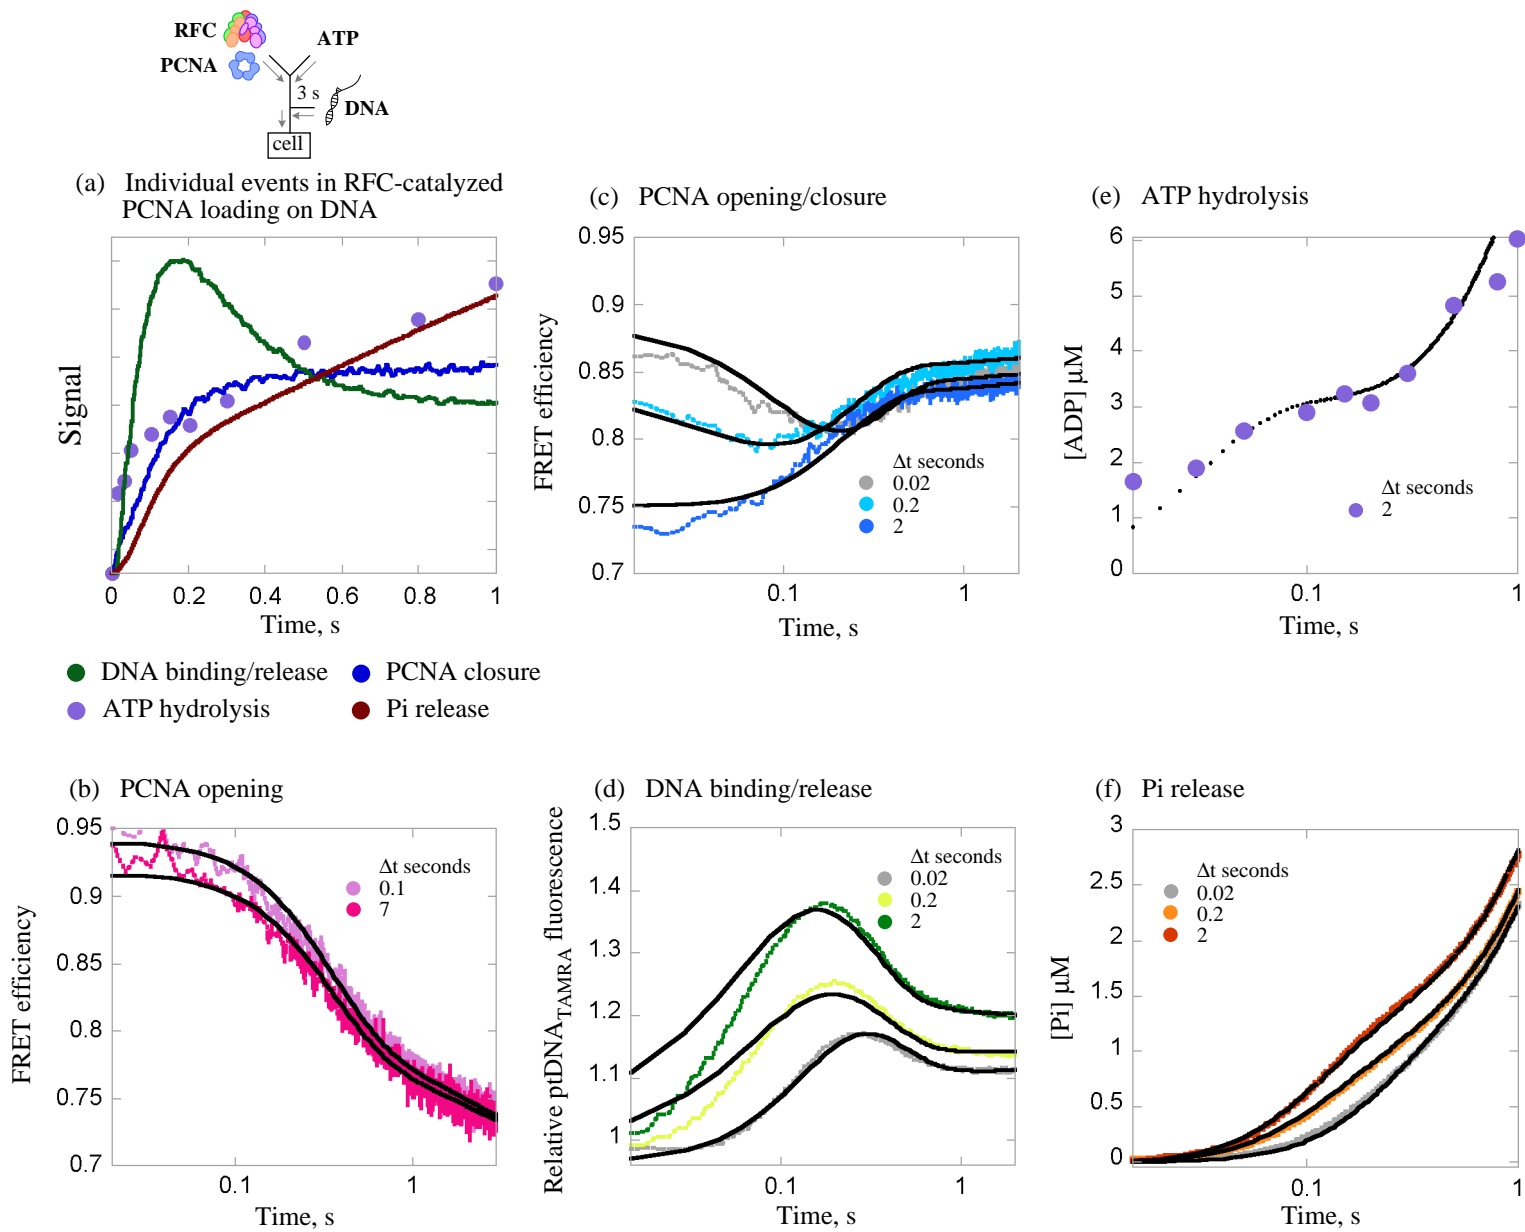

Figure S3

Confidence contours for unknown rate constants derived from global fitting of kinetic data to a minimal model (Scheme I)

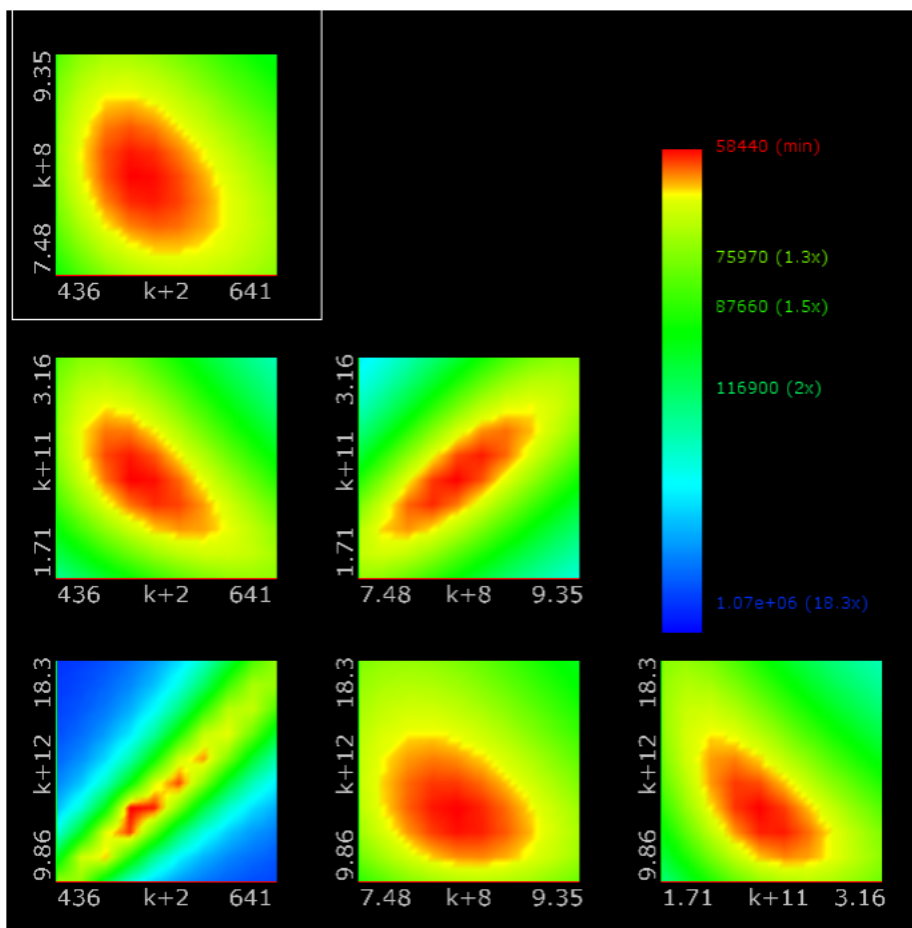

Figure S4

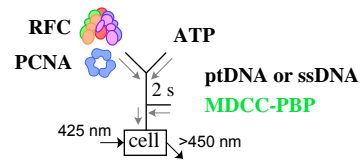

RFC-catalyzed ATP hydrolysis and phosphate (Pi) release

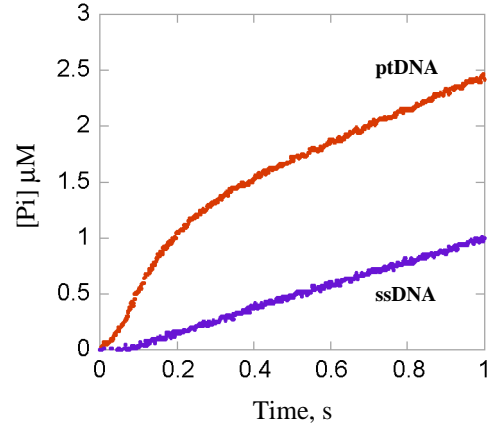

Figure S5
